# Supplementary material for: Tailoring the Co4+/Co3+ active sites in a single perovskite as a bifunctional catalyst for the oxygen electrode reactions
Source: Royal Society of Chemistry journal article supplement (doi:10.1039/d0dt04333h), 2021-01-01
Supplement: d0dt04333h1.pdf [file d0dt04333h1.pdf]

# Supplementary information

## **Tailoring the Co<sup>4+</sup>/Co<sup>3+</sup> active sites in single perovskite as a bifunctional catalyst for oxygen electrode reactions**

Song-Jeng Huang <sup>a, +</sup>, Adil Muneeb <sup>a, b, + \*</sup>, Palani Sabhapathy <sup>c</sup>, Anji Sheelam <sup>b</sup>, Khasim Saheb Bayikadi <sup>b</sup>, Raman Sankar <sup>b \*</sup>

<sup>a</sup> Department of Mechanical Engineering, National Taiwan University of Science and Technology, No. 43, Section 4, Keelung Road, Taipei 10607, Taiwan, R.O.C.

<sup>b</sup> Institute of Physics, Academia Sinica, Taipei 11529, Taiwan; Center for Condensed Matter Sciences, National Taiwan University, Taipei 10617, Taiwan;

<sup>c</sup> Center for Condensed Matter Sciences, National Taiwan University, Taipei-10617, Taiwan

+ equal contribution & \* corresponding authors

| PrCoO <sub>3</sub>          |          |         | Pr <sub>x</sub> Ca <sub>1-x</sub> Co <sub>0.8</sub> Fe <sub>0.2</sub> O <sub>3</sub> |          |          |
|-----------------------------|----------|---------|--------------------------------------------------------------------------------------|----------|----------|
| Sample                      |          |         | x=0.1                                                                                | X=0.2    | X=0.3    |
| Atomic Coordinates<br>Pr,Ca | x        | 0.99640 | -0.03240                                                                             | -0.0324  | -0.03240 |
|                             | y        | 0.02940 | 0.25000                                                                              | 0.25000  | 0.25000  |
|                             | z        | 0.25000 | -0.00710                                                                             | 0.00710  | 0.00710  |
| Atomic Coordinates O1       | x        | 0.06770 | 0.50650                                                                              | 0.50650  | 0.50650  |
|                             | y        | 0.49410 | 0.25000                                                                              | 0.25000  | 0.25000  |
|                             | z        | 0.25000 | 0.06420                                                                              | 0.06420  | 0.06420  |
| Atomic Coordinates O2       | x        | 0.71740 | 0.22030                                                                              | 0.22030  | 0.22030  |
|                             | y        | 0.28310 | 0.03240                                                                              | 0.03240  | 0.03240  |
|                             | z        | 0.06373 | 0.78540                                                                              | 0.78540  | 0.78540  |
| Bond Distances (Å)          | Co-O1    | 1.9301  | 1.93242                                                                              | 1.9324   | 1.93352  |
|                             |          | 1.9724  | 1.95604                                                                              | 1.95559  | 1.95705  |
|                             | Co-O2    | 1.9717  | 1.91173                                                                              | 1.91147  | 1.91298  |
| Bond Angles (deg)           | Co-O1-Co | 158.170 | 159.267                                                                              | 159.275  | 159.272  |
|                             | Co-O2-Co | 148.001 | 159.1845                                                                             | 159.1825 | 159.1846 |
| Bragg R-factor              |          | 9.16 %  | 6.29 %                                                                               | 5.33 %   | 13.51 %  |
| RF-factor                   |          | 16.5%   | 6.95 %                                                                               | 6.765 %  | 15.09 %  |
| Chi <sup>2</sup>            |          | 1.17    | 1.27                                                                                 | 1.10     | 1.18     |

**Table S1.** Structural parameters of the catalysts obtained from Ritveld refinement of XRD powder data

| Table S2. Binding energy values of Co <sup>4+</sup> and Co <sup>3+</sup> oxidation states in PrCoO <sub>3-δ</sub> , Pr <sub>x</sub> Ca <sub>1-x</sub> Co <sub>0.8</sub> Fe <sub>0.2</sub> O <sub>3-δ</sub> |                  |                  |           |
|------------------------------------------------------------------------------------------------------------------------------------------------------------------------------------------------------------|------------------|------------------|-----------|
|                                                                                                                                                                                                            | Co <sup>4+</sup> | Co <sup>3+</sup> | ΔE        |
| Pure                                                                                                                                                                                                       | 781.31 ± .06     | 779.11 ± .02     | 2.2 ± .08 |
| x=0.1                                                                                                                                                                                                      | 781.36 ± .01     | 779.13 ± .02     | 2.2 ± .03 |
| x=0.2                                                                                                                                                                                                      | 781.35 ± .04     | 779.12 ± .01     | 2.2 ± .05 |
| x=0.3                                                                                                                                                                                                      | 781.36 ± .05     | 779.13 ± .02     | 2.2 ± .07 |

**Table S2.** Binding energy values of  $\text{Co}^{4+}$  and  $\text{Co}^{3+}$  oxidation states in  $\text{PrCoO}_{3-\delta}$ ,  $\text{Pr}_x\text{Ca}_{1-x}\text{Co}_{0.8}\text{Fe}_{0.2}\text{O}_{3-\delta}$

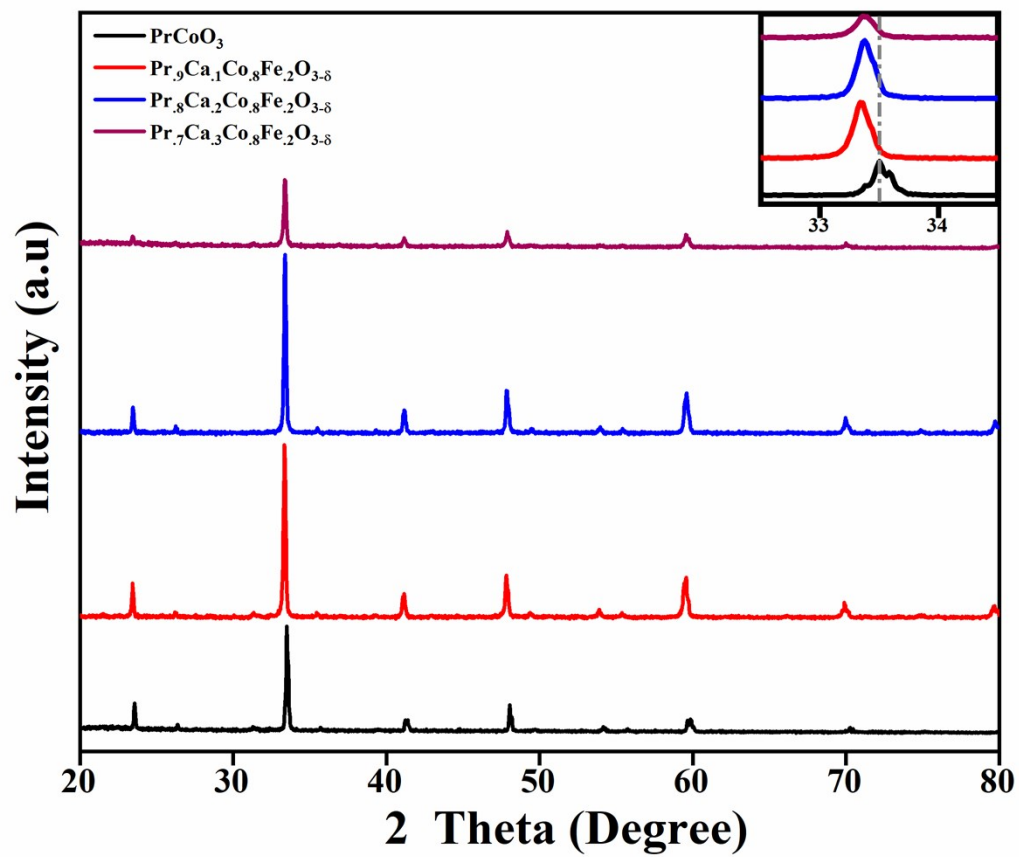

Fig. S1 Powder X-ray Diffraction data of the perovskite catalysts.

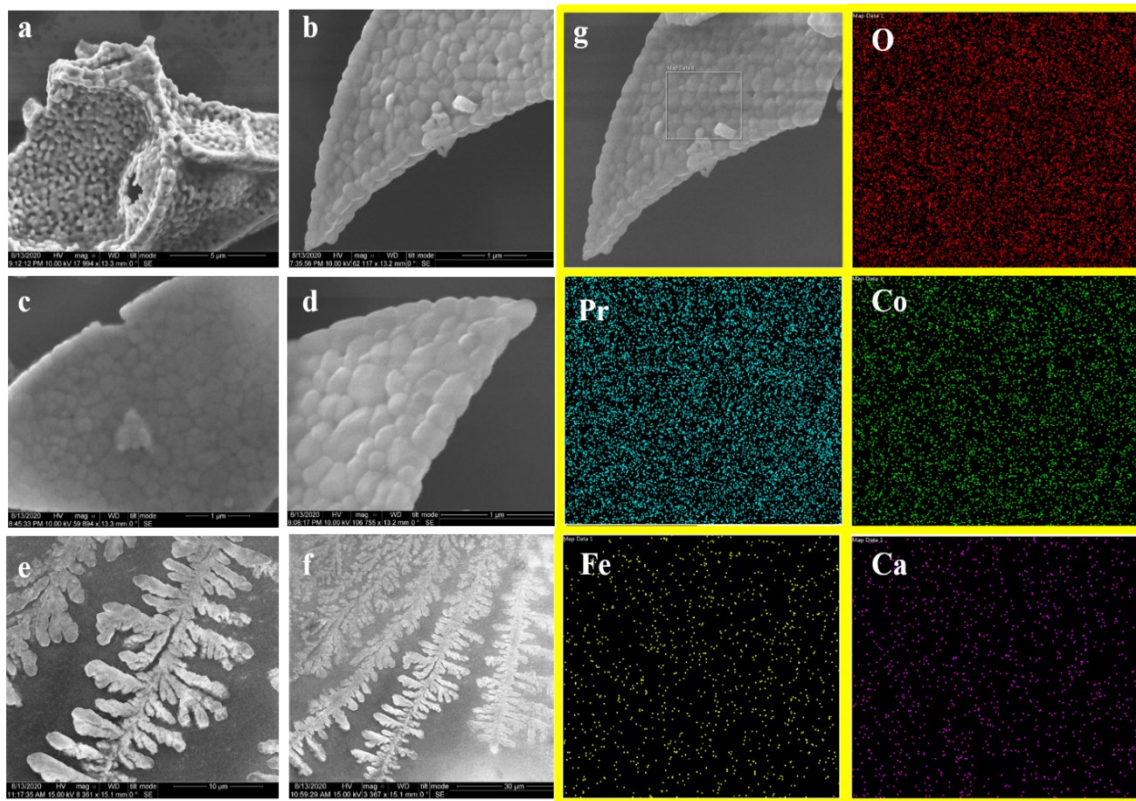

**Fig. S2** Scanning electron microscopy (SEM) images of the perovskite catalysts, (a)  $\text{PrCoO}_{3-\delta}$ , (b-d)  $\text{Pr}_{1-x}\text{Ca}_x\text{Co}_{0.8}\text{Fe}_{0.2}\text{O}_{3-\delta}$  ( $x=0.1-0.2$ ), (e-f) leaf-like micro/nanostructure after self-assembly, and (g) elemental mapping of  $\text{Pr}_{0.9}\text{Ca}_{0.1}\text{Co}_{0.8}\text{FeO}_{3-\delta}$ .

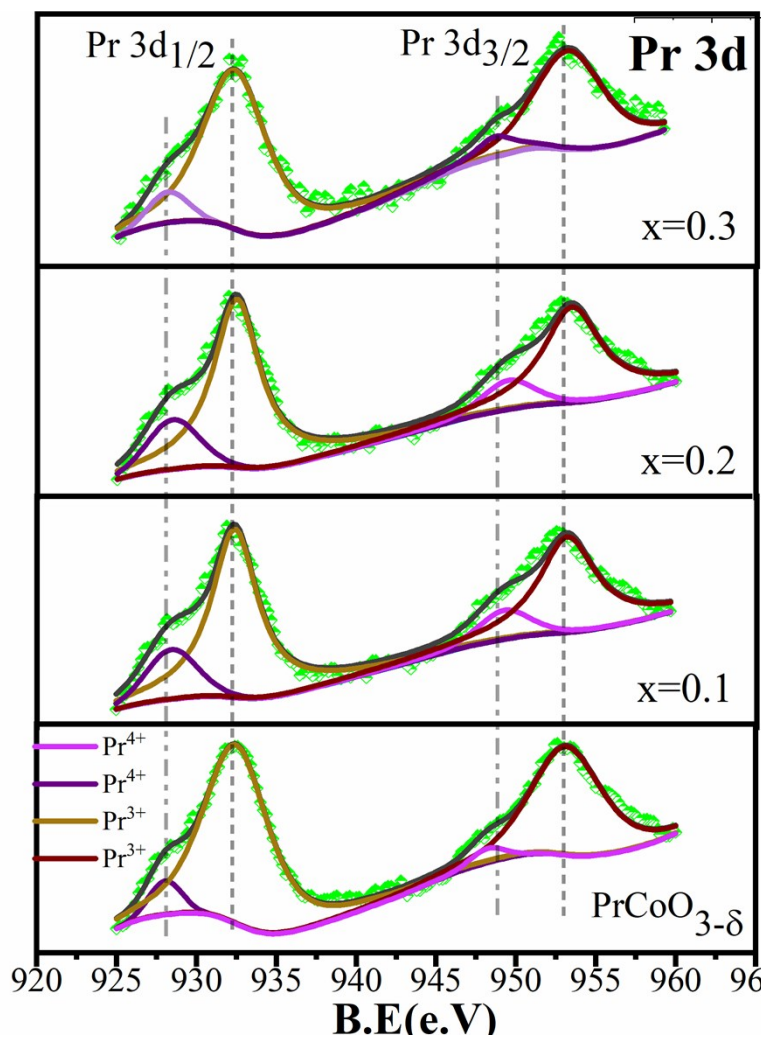

**Fig. S3** XPS for Pr 3d spectra of PrCoO<sub>3-δ</sub>, Pr<sub>1-x</sub>Ca<sub>x</sub>Co<sub>0.8</sub>Fe<sub>0.2</sub>O<sub>3-δ</sub> (x=0.1-0.3)

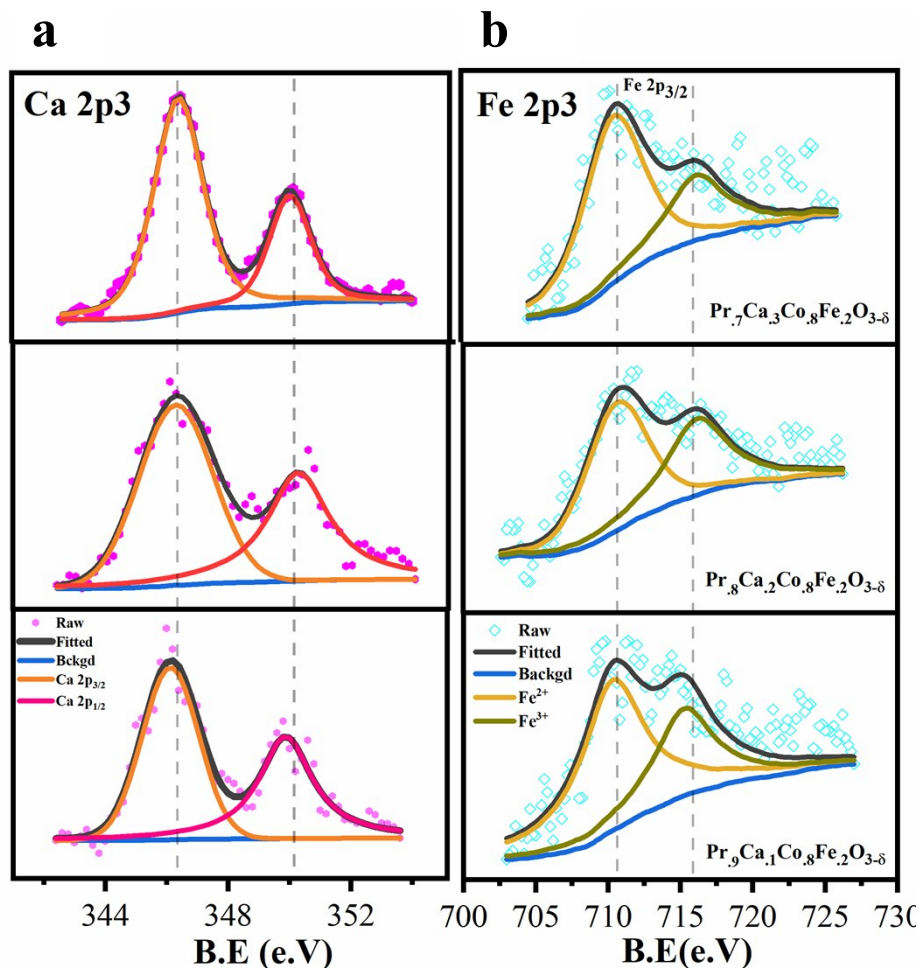

**Fig. S4** X-ray photoelectron spectroscopy (XPS) of the perovskite catalysts, (a) XPS for Ca 2p spectra of  $\text{Pr}_{1-x}\text{Ca}_x\text{Co}_{0.8}\text{Fe}_{0.2}\text{O}_{3-\delta}$  ( $x=0.1-0.3$ ) and (b) XPS Fe 2p spectra of  $\text{Pr}_{1-x}\text{Ca}_x\text{Co}_{0.8}\text{Fe}_{0.2}\text{O}_{3-\delta}$  ( $x=0.1-0.3$ ).

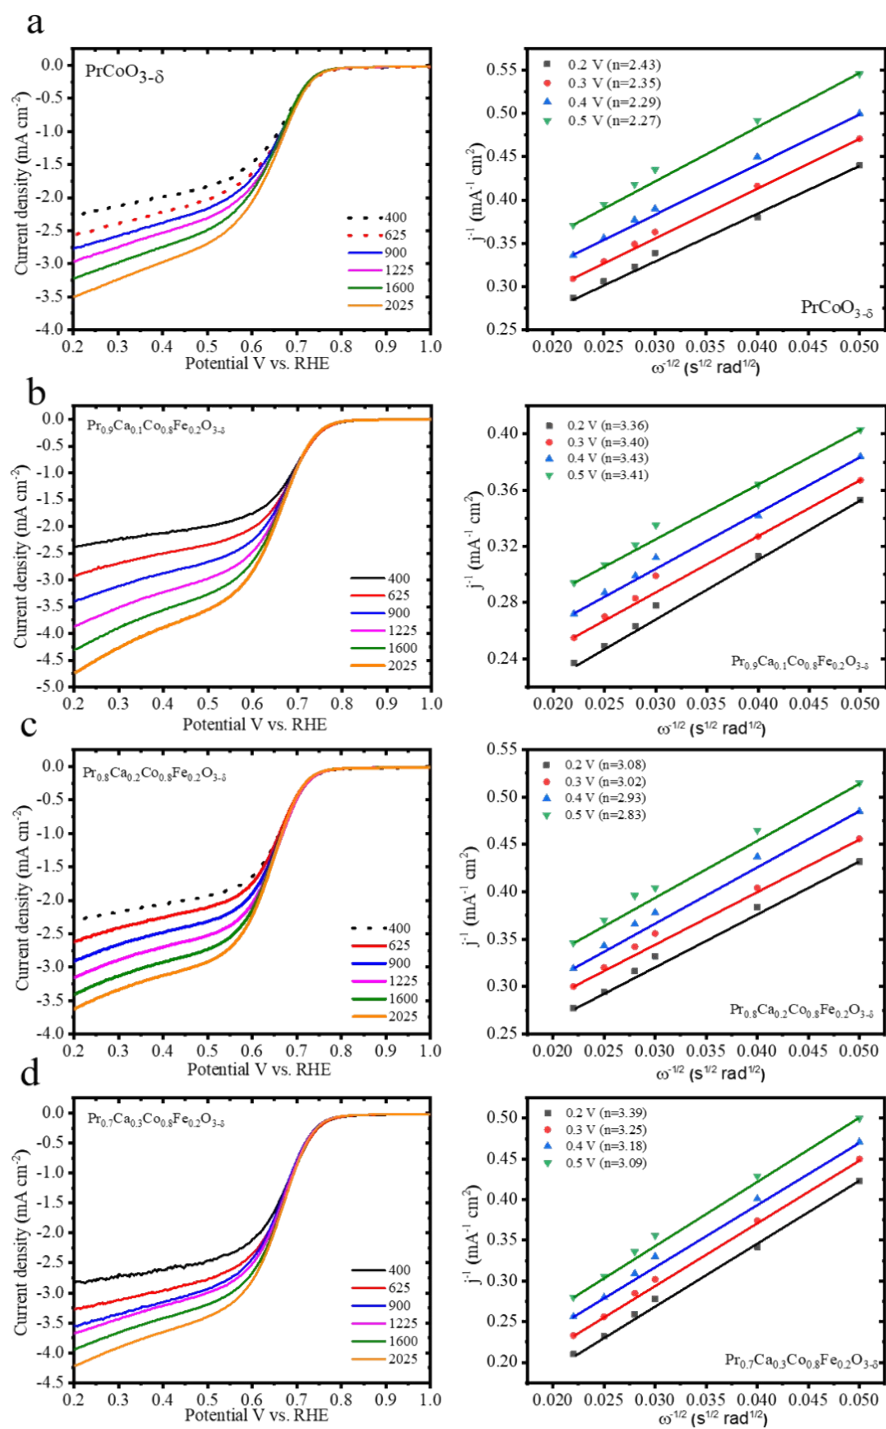

**Fig. S5** LSV curves at different rotation speeds along with Corresponding K-L plots at different potentials (a)  $\text{PrCoO}_{3-\delta}$ . (b-d)  $\text{Pr}_{1-x}\text{Ca}_x\text{Co}_{0.8}\text{Fe}_{0.2}\text{O}_{3-\delta}$  ( $x=0.1-0.3$ ).



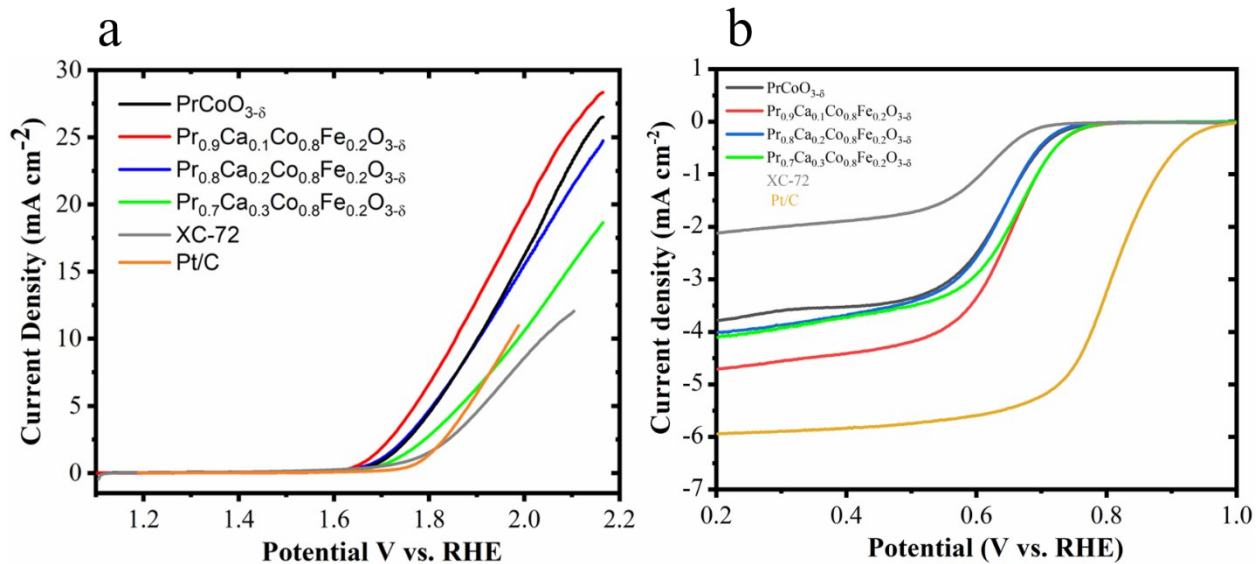

**Fig. S6** LSV curves of standard Pt/C and Xc-72 at 1600 rpm (a) OER (b) ORR.
